# Supplementary material for: Carbon emissions and economic impact of EU’s embargoing Russian fossil fuels
Source: Research Square preprint supplement (doi:10.21203/rs.3.rs-1683339/v1), 2022-05-25
Supplement: Supplementary file 1 [file b2fe45d886d97aa847e15c7b.xlsx]

## Sheet: CO2 emissions
1. The changes of CO2 emissions under all scenarios in 2022 (%)
Scenario		Region
		USA	China	Japan	Russia	India	OBU	EU	OWE	EES	Asia	MAF	LAM	Global
Disruption scenarios	Moderate Disruption	-0.395698	-0.0663452	-0.551868	5.91293	-0.24041	-0.574862	-13.3482	-1.09652	0.00248389	-0.179085	-0.559714	-0.518324	-1.25365
	Strong Disruption	-0.763795	-0.287109	-1.32499	8.52843	-0.561633	-0.999536	-19.3431	-2.01326	-0.0874836	-0.586206	-0.983388	-0.905958	-1.99776
Supply-chain Shift Scenarios	Moderate Disruption	-0.42882	-0.0915825	-0.679611	5.91456	-0.307927	-0.58766	-13.0493	-1.09287	0.0106335	-0.246511	-0.570323	-0.532134	-1.25075
	Strong Disruption	-0.799067	-0.313873	-1.46366	8.53044	-0.632642	-1.0127	-19.0417	-2.00853	-0.0777573	-0.659081	-0.995082	-0.920654	-1.99647
Demand-side Response Scenarios	Moderate Disruption	-0.301826	0.033892	-0.297574	5.92481	-0.111085	-0.461593	-14.9216	-0.85002	0.0415851	-0.0191115	-0.471407	-0.406571	-1.32155
	Strong Disruption	-0.669717	-0.186772	-1.06842	8.53848	-0.431343	-0.886857	-20.8362	-1.76893	-0.0518235	-0.424988	-0.896418	-0.795071	-2.05746
2. The changes in absolute CO2 emissions under each scenario in 2022 (Mt CO2)
Scenario		Region
		USA	China	Japan	Russia	India	OBU	EU	OWE	EES	Asia	MAF	LAM	Global
Disruption scenarios	Moderate Disruption	-24.3391	-8.57458	-7.11494	160.688	-7.57088	-6.77064	-610.628	-6.51064	0.0305618	-6.86878	-24.3021	-11.0078	-552.969
	Strong Disruption	-46.9806	-37.1066	-17.0824	231.767	-17.6867	-11.7724	-884.872	-11.9538	-1.0764	-22.4839	-42.6975	-19.24	-881.186
Supply-chain Shift Scenarios	Moderate Disruption	-26.3765	-11.8363	-8.76186	160.733	-9.6971	-6.92138	-596.953	-6.489	0.130835	-9.45492	-24.7627	-11.3011	-551.691
	Strong Disruption	-49.1501	-40.5656	-18.8702	231.821	-19.9229	-11.9275	-871.085	-11.9258	-0.956729	-25.279	-43.2052	-19.5521	-880.619
Demand-side Response Scenarios	Moderate Disruption	-18.5651	4.38027	-3.83646	161.011	-3.49822	-5.43658	-682.605	-5.04704	0.511665	-0.733021	-20.4679	-8.63444	-582.921
	Strong Disruption	-41.1939	-24.1388	-13.7746	232.04	-13.5837	-10.4453	-953.177	-10.5031	-0.637638	-16.3004	-38.9214	-16.8851	-907.521

## Sheet: GDP
1. The changes of GDP under all scenarios in 2022 (%)
Scenario		Region
		USA	China	Japan	Russia	India	OBU	EU	OWE	EES	Asia	MAF	LAM	Global
Disruption scenarios	Moderate Disruption	-0.121672	-0.124776	-0.139527	-3.70612	-0.145605	-0.15585	-1.57532	-0.320191	0.0366492	-0.175103	-0.0964499	-0.102076	-0.512377
	Strong Disruption	-0.241183	-0.254147	-0.272572	-5.52404	-0.285912	-0.267385	-2.6428	-0.56745	-0.0464308	-0.340467	-0.167537	-0.174122	-0.865743
Supply-chain Shift Scenarios	Moderate Disruption	-0.126406	-0.132472	-0.153836	-3.70415	-0.161368	-0.156051	-1.52571	-0.307151	0.0426957	-0.184484	-0.0906531	-0.102229	-0.506206
	Strong Disruption	-0.246356	-0.262603	-0.288575	-5.5219	-0.303021	-0.267612	-2.58975	-0.552458	-0.0380963	-0.350943	-0.161396	-0.174275	-0.859243
Demand-side Response Scenarios	Moderate Disruption	-0.0896811	-0.0843909	-0.10462	-3.6968	-0.108798	-0.12989	-0.78748	-0.244178	0.0590764	-0.131365	-0.0783787	-0.0829264	-0.331881
	Strong Disruption	-0.208953	-0.213225	-0.236763	-5.51466	-0.248093	-0.241235	-1.84533	-0.49121	-0.0211775	-0.295755	-0.149515	-0.15471	-0.682999
2. The changes in absolute GDP under each scenario in 2022 (billion $, 2011 constant price)
Scenario		Region
		USA	China	Japan	Russia	India	OBU	EU	OWE	EES	Asia	MAF	LAM	Global
Disruption scenarios	Moderate Disruption	-24.5777	-19.9549	-8.87807	-100.904	-5.27749	-6.64497	-307.058	-9.31657	0.345465	-13.5538	-6.91013	-8.54286	-511.273
	Strong Disruption	-48.7188	-40.6448	-17.3438	-150.399	-10.363	-11.4005	-515.129	-16.511	-0.437668	-26.3538	-12.0032	-14.5724	-863.877
Supply-chain Shift Scenarios	Moderate Disruption	-25.5339	-21.1858	-9.78859	-100.85	-5.84883	-6.65351	-297.389	-8.93714	0.40246	-14.28	-6.49481	-8.55564	-505.115
	Strong Disruption	-49.7638	-41.9972	-18.362	-150.341	-10.9831	-11.4102	-504.788	-16.0748	-0.359105	-27.1646	-11.5631	-14.5852	-857.392
Demand-side Response Scenarios	Moderate Disruption	-18.1155	-13.4963	-6.65696	-100.65	-3.9434	-5.53809	-153.494	-7.10483	0.556868	-10.1683	-5.61541	-6.94018	-331.166
	Strong Disruption	-42.2083	-34.1003	-15.0652	-150.143	-8.99218	-10.2855	-359.687	-14.2927	-0.199624	-22.8928	-10.712	-12.9478	-681.527
