# Supplementary material for: Carbon emissions and economic impact of EU’s embargoing Russian fossil fuels
Source: Research Square preprint supplement (doi:10.21203/rs.3.rs-1683339/v1), 2022-05-25
Supplement: Supplementary file 2 [file b5a92feb363542d74b82797e.docx]

**Supplementary material : Scenario design for uncertainty analysis**

Three types of uncertainty analysis are performed by examining each disruption product separately (Table S1), assuming different labor markets (Table S2), and limiting different degrees of trade substitution effects (Table S3).

Table S1. Scenario designs for single disruption product

| **Scenarios** | | **Fossil fuel** | | |
| --- | --- | --- | --- | --- |
| **Oil** | **Gas** | **Coal** |
| **Business As Usual** | **BAU** |  |  |  |
| **Moderate Disruption** | **MD_oil** | *61%* |  |  |
| **MD_gas** |  | *70%* |  |
| **MD_coal** |  |  | *64%* |
| **MD_fossil** | *61%* | *70%* | *64%* |
| **Strong Disruption** | **SD_oil** | *90%* |  |  |
| **SD _gas** |  | *90%* |  |
| **SD _coal** |  |  | *90%* |
| **SD _fossil** | *90%* | *90%* | *90%* |

Note: The numbers represent the proportion of broken supply for certain products. The two disruption scenarios in the text corresponds to “MD_fossil” and “SD_fossil” here.

Table S2. Scenario designs for labor market

| **Scenarios** | | **Disruption** |
| --- | --- | --- |
| **Labor Market Assumption** | **Full-employment** | **Flexible wage and mobile labors** |
| **Labor-surplus** | **Rigid wage and mobile labors** |
| **Sector-segmented labor market under Labor-surplus** | **Rigid wage and non-mobile labors** |

Note: Both core disruption scenarios that “MD_fossil” and “SD_fossil”, will be examined all of above three labor market assumptions.

Table S3. Scenario designs for trade substitution effect

| **Scenarios** | **Fossil fuel** | | |
| --- | --- | --- | --- |
| **Oil** | **Gas** | **Coal** |
| **Strict trade substitution limit** | *100%* | *80%* | *0* |
| **Moderate trade substitution limit** | *50%* | *40%* | *0* |
| **No trade substitution limit** | *0* | *0* | *0* |

Note: Both core disruption scenarios that “MD_fossil” and “SD_fossil”, will be examined all of above three trade substitution limit assumptions.
