# Supplementary material for: Carbon emissions and economic impact of EU’s embargoing Russian fossil fuels
Source: Research Square preprint supplement (doi:10.21203/rs.3.rs-1683339/v1), 2022-05-25
Supplement: Supplementary file 4 [file e2165e207685e92f9d94eb79.xlsx]

## Sheet: 1. UA-Broken supply amplitude
1. Uncertainty analysis--Broken supply amplitude
1. 1 The change of GDP under all scenarios in 2022 (%)
Scenario		Region
		USA	China	Japan	Russia	India	OBU	EU	OWE	EES	Asia	MAF	LAM
Moderate Disruption	MD_oil	-0.113868	-0.125312	-0.129772	-1.40428	-0.147112	-0.137064	-0.799242	-0.183616	0.355933	-0.169808	-0.0670013	-0.08371
	MD_gas	0.0142747	0.018809	0.0327665	-1.46734	0.0238383	0.00291038	-0.652594	-0.0643251	0.121662	0.0206729	-0.0192122	-0.00348031
	MD _coal	-0.00120458	0.00536668	0.00717681	-0.0483826	-0.000458346	0.000338678	-0.0393582	-0.00478995	0.0241854	0.00620935	-0.000724207	-0.00135699
	MD _fossil	-0.121672	-0.124776	-0.139527	-3.70612	-0.145605	-0.15585	-1.57532	-0.320191	0.0366492	-0.175103	-0.0964499	-0.102076
Stronger Disruption Extent	SD_oil	-0.227169	-0.252176	-0.257798	-2.59193	-0.284576	-0.241746	-1.46204	-0.361271	0.422326	-0.328323	-0.121956	-0.147441
	SD _gas	0.0157125	0.0226225	0.0435329	-1.88908	0.0302008	0.00147243	-1.03495	-0.105413	0.158967	0.0244482	-0.0312896	-0.00694484
	SD_coal	-0.00235383	0.006321	0.00900294	-0.0676842	-0.0026783	0.000839925	-0.0667353	-0.00859541	0.034157	0.00744157	-0.00140119	-0.00245777
	SD _fossil	-0.241183	-0.254147	-0.272572	-5.52404	-0.285912	-0.267385	-2.6428	-0.56745	-0.0464308	-0.340467	-0.167537	-0.174122
1.2 The changes of CO2 emissions under all scenarios in 2022 (%)
Scenario		Region
		USA	China	Japan	Russia	India	OBU	EU	OWE	EES	Asia	MAF	LAM
Moderate Disruption	MD_oil	-0.287856	-0.177826	-0.561053	3.72064	-0.266105	-0.524876	-2.45004	-0.366167	1.69623	-0.379178	-0.484984	-0.398511
	MD_gas	0.0943285	0.102302	0.322897	0.761144	0.145289	0.0763861	-8.7792	-0.220761	0.0377872	0.174039	0.059568	0.0411126
	MD _coal	-0.0250506	0.059931	0.159	-0.180607	-0.0336649	-0.0131407	-0.900621	-0.0292196	0.22376	0.144947	0.00976495	-0.00279519
	MD _fossil	-0.395698	-0.0663452	-0.551868	5.91293	-0.24041	-0.574862	-13.3482	-1.09652	0.00248389	-0.179085	-0.559714	-0.518324
Stronger Disruption Extent	SD_oil	-0.609857	-0.425196	-1.30057	5.49	-0.567962	-0.930578	-4.35204	-0.926033	2.29026	-0.827875	-0.877378	-0.730114
	SD _gas	0.125943	0.139272	0.441304	0.941476	0.204294	0.102791	-12.3047	-0.369829	0.0559521	0.235851	0.0748265	0.0490687
	SD_coal	-0.0417613	0.0718474	0.201316	-0.252781	-0.0785127	-0.0233783	-1.37251	-0.0688714	0.31453	0.188571	0.00942058	-0.0104666
	SD _fossil	-0.763795	-0.287109	-1.32499	8.52843	-0.561633	-0.999536	-19.3431	-2.01326	-0.0874836	-0.586206	-0.983388	-0.905958
1.3 The change of trade dependence in EU under all scenarios in 2022 (Percentage points)
Scenario		Commodities
		Coal	Crude oil	Natural gas
Moderate Disruption	MD_oil	0.413711	-2.29991	0.742033
	MD_gas	-0.0152016	0.118298	-8.84894
	MD _coal	-3.13896	-0.0047586	0.0067302
	MD _fossil	-3.45784	-2.3148	-8.6804
Stronger Disruption Extent	SD_oil	0.216924	-3.75723	0.85501
	SD _gas	-0.159295	0.129686	-13.6669
	SD_coal	-4.77048	-0.0100449	0.00594264
	SD _fossil	-5.79554	-3.82662	-13.4064
1.4 The change of importing structure
1.4.1 The change of importing structure of Coal in EU under all scenarios in 2022 (Percentage points)
Scenario		Region
		USA	China	Japan	Russia	India	OBU	OWE	EES	Asia	MAF	LAM
Moderate Disruption	MD_oil	-0.514683	-0.00263325	-1.7287e-06	4.66	-1.12932e-05	-1.52215	-0.0232208	0.0322003	-0.518794	-0.910667	-0.82962
	MD_gas	-0.087245	-0.000880491	-5.05989e-07	0.943652	-3.8522e-06	-0.44741	0.00586181	-0.00164113	-0.1568	-0.172724	-0.0360963
	MD _coal	3.09307	0.0142203	9.05201e-06	-20.6159	6.24033e-05	7.40534	0.156759	1.23872	2.30918	3.6651	4.33074
	MD _fossil	3.09273	0.0126669	8.1713e-06	-19.4594	5.5996e-05	6.45221	0.173736	1.56975	1.90843	3.10014	4.37695
Stronger Disruption Extent	SD_oil	-0.680287	-0.00355107	-2.33484e-06	6.36181	-1.51987e-05	-2.06851	-0.0249157	-0.00566359	-0.705183	-1.27119	-1.05458
	SD _gas	-0.100244	-0.00123334	-6.89037e-07	1.18937	-5.39332e-06	-0.616931	0.0128201	-0.00655215	-0.217867	-0.2253	0.0211389
	SD_coal	5.03992	0.0238522	1.49991e-05	-30.3486	0.000104724	12.3218	0.253067	2.02781	3.86074	6.01221	6.9848
	SD _fossil	5.25935	0.0216346	1.39208e-05	-29.6971	9.56424e-05	11.0213	0.303736	2.48289	3.27913	5.266	7.57508
1.4.2 The change of importing structure of Oil in EU under all scenarios in 2022 (Percentage points)
Scenario		Region
		USA	China	Japan	Russia	India	OBU	OWE	EES	Asia	MAF	LAM
Moderate Disruption	MD_oil	2.17388	0.486545	0.130259	-23.1807	1.03932	0.0972245	2.83827	3.94641	2.31242	12.6242	1.31176
	MD_gas	-0.0280161	-0.00322032	-0.000533306	1.07861	-0.0104296	-0.00135774	-0.109092	-0.210165	-0.102835	-0.58144	-0.0539517
	MD _coal	-2.19502e-05	0.000525914	0.000363891	0.0860715	0.00026279	-4.66739e-05	-0.00463968	-0.0106503	-0.00941211	-0.0580765	-0.0054583
	MD _fossil	2.28854	0.513613	0.138181	-23.0058	1.09702	0.101105	2.8752	3.81648	2.27024	12.3318	1.29254
Stronger Disruption Extent	SD_oil	3.6529	0.817788	0.216553	-36.0693	1.72055	0.167233	4.68923	6.50856	4.06838	22.0447	2.33121
	SD _gas	-0.0170333	-0.000400649	0.000465269	1.3383	-0.00423231	-0.00114529	-0.123687	-0.268496	-0.131178	-0.746642	-0.068339
	SD_coal	0.00114478	0.000982599	0.000549451	0.118561	0.000907524	-4.18207e-05	-0.00510313	-0.0150074	-0.0133411	-0.082047	-0.00779463
	SD _fossil	3.84742	0.863148	0.229881	-35.9933	1.81854	0.173938	4.79054	6.34703	4.01502	21.6653	2.30493
1.4.3 The change of importing structure of Natural gas in EU under all scenarios in 2022 (Percentage points)
Scenario		Region
		USA	China	Russia	India	OBU	OWE	EES	Asia	MAF	LAM
Moderate Disruption	MD_oil	-0.0125307	-6.92945e-06	4.46047	-2.89764e-07	-0.0238227	-1.98119	-0.042316	-0.131345	-3.51919	-0.169791
	MD_gas	0.0432353	2.6174e-05	-19.5189	1.1379e-06	0.0877164	14.6947	0.146212	0.526284	14.6568	0.703205
	MD _coal	-0.000297735	-1.54715e-07	0.0641249	-6.45578e-09	-0.000578527	-0.0165978	-0.000874882	-0.00309991	-0.0615392	-0.00366149
	MD _fossil	0.0432353	2.6174e-05	-19.5189	1.1379e-06	0.0877164	14.6947	0.146212	0.526284	14.6568	0.703205
Stronger Disruption Extent	SD_oil	-0.0165507	-9.23143e-06	5.96416	-3.86566e-07	-0.0314494	-2.52474	-0.0574299	-0.172767	-4.74714	-0.225193
	SD _gas	0.0744314	4.50597e-05	-30.1541	1.95894e-06	0.151008	25.2975	0.251711	0.90602	25.2323	1.2106
	SD_coal	-0.000429159	-2.22225e-07	0.0861784	-9.23795e-09	-0.000847215	-0.0178967	-0.0012586	-0.00445405	-0.086165	-0.00520598
	SD _fossil	0.0744314	4.50597e-05	-30.1541	1.95894e-06	0.151008	25.2975	0.251711	0.90602	25.2323	1.2106

## Sheet: 2. UA-Labor supply market
2. Uncertainty analysis--Labor supply market
2. 1 The change of GDP under all scenarios in 2022 (%)
Scenario		Region
		USA	China	Japan	Russia	India	OBU	EU	OWE	EES	Asia	MAF	LAM
Moderate Disruption	Full-employment	-0.0138026	-0.0295681	-0.0413002	-2.72446	-0.0250863	-0.0208499	-0.510414	-0.0901719	-0.270226	-0.0511027	-0.0367201	-0.0250682
	Labor-surplus	-0.121672	-0.124776	-0.139527	-3.70612	-0.145605	-0.15585	-1.57532	-0.320191	0.0366492	-0.175103	-0.0964499	-0.102076
	Sector-segmented labor market under Labor-surplus	-0.157146	-0.163106	-0.15867	-6.12493	-0.179548	-0.182563	-1.60645	-0.369067	-0.612723	-0.208459	-0.188185	-0.123349
Stronger Disruption Extent	Full-employment	-0.0252814	-0.0525194	-0.0752383	-4.52639	-0.0472329	-0.0361094	-0.929921	-0.157873	-0.480983	-0.0911333	-0.0697191	-0.0418749
	Labor-surplus	-0.241183	-0.254147	-0.272572	-5.52404	-0.285912	-0.267385	-2.6428	-0.56745	-0.0464308	-0.340467	-0.167537	-0.174122
	Sector-segmented labor market under Labor-surplus	-0.302029	-0.313767	-0.305181	-8.97888	-0.345093	-0.315103	-2.69796	-0.633567	-0.964588	-0.393676	-0.329473	-0.211824
					-2.41881			-0.0311295
					-3.45484			-0.0551629
2.2 The changes of CO2 emissions under all scenarios in 2022 (%)
Scenario		Region
		USA	China	Japan	Russia	India	OBU	EU	OWE	EES	Asia	MAF	LAM
Moderate Disruption	Full-employment	-0.341382	-0.0155086	-0.577009	7.02763	-0.173014	-0.488287	-12.3948	-0.871832	-0.289894	-0.1333	-0.560115	-0.478182
	Labor-surplus	-0.395698	-0.0663452	-0.551868	5.91293	-0.24041	-0.574862	-13.3482	-1.09652	0.00248389	-0.179085	-0.559714	-0.518324
	Sector-segmented labor market under Labor-surplus	-0.492937	-0.157071	-0.698794	3.10765	-0.328146	-0.645243	-13.3325	-1.21415	-0.542822	-0.294142	-0.6836	-0.626212
Stronger Disruption Extent	Full-employment	-0.644374	-0.167297	-1.34614	9.67573	-0.415711	-0.849613	-17.8723	-1.62436	-0.507957	-0.475437	-0.987936	-0.83865
	Labor-surplus	-0.763795	-0.287109	-1.32499	8.52843	-0.561633	-0.999536	-19.3431	-2.01326	-0.0874836	-0.586206	-0.983388	-0.905958
	Sector-segmented labor market under Labor-surplus	-0.935526	-0.428816	-1.5617	4.47034	-0.7049	-1.12807	-19.3486	-2.19653	-0.858406	-0.763612	-1.20056	-1.09743
2.3 The change of trade dependence in EU under all scenarios in 2022 (Percentage points)
Scenario		Commodities
		Coal	Crude oil	Natural gas
Moderate Disruption	Full-employment	-3.44677	-2.22042	-8.75989
	Labor-surplus	-3.45784	-2.3148	-8.6804
	Sector-segmented labor market under Labor-surplus	-3.47945	-2.29526	-8.51166
Stronger Disruption Extent	Full-employment	-5.76415	-3.66058	-13.5371
	Labor-surplus	-5.79554	-3.82662	-13.4064
	Sector-segmented labor market under Labor-surplus	-5.83813	-3.79844	-13.1501
2.4 The change of importing structure
2.4.1 The change of importing structure of Coal in EU under all scenarios in 2022 (Percentage points)
Scenario		Region
		USA	China	Japan	Russia	India	OBU	OWE	EES	Asia	MAF	LAM
Moderate Disruption	Full-employment	3.11286	0.0131131	8.42773e-06	-19.6547	5.79846e-05	6.64323	0.169054	1.54495	1.96904	3.14803	4.33685
	Labor-surplus	3.09273	0.0126669	8.1713e-06	-19.4594	5.5996e-05	6.45221	0.173736	1.56975	1.90843	3.10014	4.37695
	Sector-segmented labor market under Labor-surplus	3.10506	0.0124966	8.07987e-06	-19.4278	5.52143e-05	6.37104	0.174998	1.63331	1.89546	3.07409	4.37791
Stronger Disruption Extent	Full-employment	5.25964	0.022288	1.42928e-05	-29.7997	9.85722e-05	11.28	0.293713	2.43511	3.36045	5.30393	7.44748
	Labor-surplus	5.25935	0.0216346	1.39208e-05	-29.6971	9.56424e-05	11.0213	0.303736	2.48289	3.27913	5.266	7.57508
	Sector-segmented labor market under Labor-surplus	5.28634	0.0213837	1.37909e-05	-29.6779	9.45057e-05	10.8971	0.306232	2.58604	3.25954	5.22405	7.58888
2.4.2 The change of importing structure of Oil in EU under all scenarios in 2022 (Percentage points)
Scenario		Region
		USA	China	Japan	Russia	India	OBU	OWE	EES	Asia	MAF	LAM
Moderate Disruption	Full-employment	2.31709	0.521328	0.13983	-23.1691	1.10915	0.103175	2.82272	3.8159	2.3046	12.4882	1.31705
	Labor-surplus	2.28854	0.513613	0.138181	-23.0058	1.09702	0.101105	2.8752	3.81648	2.27024	12.3318	1.29254
	Sector-segmented labor market under Labor-surplus	2.28058	0.515324	0.138337	-22.9627	1.09291	0.101069	2.80275	3.78207	2.27308	12.3882	1.29287
Stronger Disruption Extent	Full-employment	3.87837	0.873115	0.231485	-36.0679	1.82901	0.177025	4.66738	6.30612	4.05729	21.8273	2.34146
	Labor-surplus	3.84742	0.863148	0.229881	-35.9933	1.81854	0.173938	4.79054	6.34703	4.01502	21.6653	2.30493
	Sector-segmented labor market under Labor-surplus	3.83717	0.866103	0.230478	-35.9712	1.81233	0.174206	4.67212	6.28074	4.0248	21.8122	2.3082
2.4.3 The change of importing structure of Natural gas in EU under all scenarios in 2022 (Percentage points)
Scenario		Region
		USA	China	Russia	India	OBU	OWE	EES	Asia	MAF	LAM
Moderate Disruption	Full-employment	0.0432353	2.6174e-05	-19.5189	1.1379e-06	0.0877164	14.6947	0.146212	0.526284	14.6568	0.703205
	Labor-surplus	0.0432353	2.6174e-05	-19.5189	1.1379e-06	0.0877164	14.6947	0.146212	0.526284	14.6568	0.703205
	Sector-segmented labor market under Labor-surplus	0.0432353	2.6174e-05	-19.5189	1.1379e-06	0.0877164	14.6947	0.146212	0.526284	14.6568	0.703205
Stronger Disruption Extent	Full-employment	0.0744314	4.50597e-05	-30.1541	1.95894e-06	0.151008	25.2975	0.251711	0.90602	25.2323	1.2106
	Labor-surplus	0.0744314	4.50597e-05	-30.1541	1.95894e-06	0.151008	25.2975	0.251711	0.90602	25.2323	1.2106
	Sector-segmented labor market under Labor-surplus	0.0744314	4.50597e-05	-30.1541	1.95894e-06	0.151008	25.2975	0.251711	0.90602	25.2323	1.2106

## Sheet: 3. UA-trade substitution effect
3. Uncertainty analysis--Trade substitution effect
3. 1 The change of GDP under all scenarios in 2022 (%)
Scenario		Region
		USA	China	Japan	Russia	India	OBU	EU	OWE	EES	Asia	MAF	LAM
Moderate Disruption	Strict trade substitution limit	-0.121672	-0.124776	-0.139527	-3.70612	-0.145605	-0.15585	-1.57532	-0.320191	0.0366492	-0.175103	-0.0964499	-0.102076
	Moderate trade substitution limit	-0.0589126	-0.0382077	-0.0797243	-2.32912	-0.122525	-0.107627	-1.27641	-0.30383	1.43317	-0.113351	-0.0601503	-0.0754647
	No trade substitution limit	0.00732612	0.0486555	0.0345231	-1.27815	-0.0623569	-0.0487007	-1.1971	-0.23273	1.35464	-0.0365818	-0.0413746	-0.0438055
Strong Disruption	Strict trade substitution limit	-0.241183	-0.254147	-0.272572	-5.52404	-0.285912	-0.267385	-2.6428	-0.56745	-0.0464308	-0.340467	-0.167537	-0.174122
	Moderate trade substitution limit	-0.170778	-0.161417	-0.209655	-4.04876	-0.263484	-0.216804	-2.24052	-0.573217	1.39011	-0.270595	-0.12314	-0.145502
	No trade substitution limit	-0.0328478	0.0175361	-0.0116861	-1.61632	-0.145641	-0.098614	-2.00273	-0.410157	1.65807	-0.120584	-0.0758543	-0.0806872
3.2 The changes of CO2 emissions under all scenarios in 2022 (%)
Scenario		Region
		USA	China	Japan	Russia	India	OBU	EU	OWE	EES	Asia	MAF	LAM
Moderate Disruption	Strict trade substitution limit	-0.395698	-0.0663452	-0.551868	5.91293	-0.24041	-0.574862	-13.3482	-1.09652	0.00248389	-0.179085	-0.559714	-0.518324
	Moderate trade substitution limit	-0.324361	0.121145	-0.341343	3.82342	-0.363314	-0.455659	-9.41806	-1.13514	6.40892	-0.135766	-0.586934	-0.584711
	No trade substitution limit	0.0558906	0.340163	0.700014	1.56324	-0.220034	-0.172318	-8.88485	-0.389408	6.12058	0.245067	-0.31877	-0.376282
Strong Disruption	Strict trade substitution limit	-0.763795	-0.287109	-1.32499	8.52843	-0.561633	-0.999536	-19.3431	-2.01326	-0.0874836	-0.586206	-0.983388	-0.905958
	Moderate trade substitution limit	-0.703083	-0.0917386	-1.10459	6.71086	-0.693972	-0.889584	-14.7415	-2.02424	6.26109	-0.52991	-1.01885	-0.975538
	No trade substitution limit	-0.0455125	0.3716	0.59201	2.01265	-0.488764	-0.364507	-12.9398	-0.772778	7.96534	0.147055	-0.59875	-0.660485
3.3 The change of trade dependence in EU under all scenarios in 2022 (Percentage points)
Scenario		Commodities
		Coal	Crude oil	Natural gas
Moderate Disruption	Strict trade substitution limit	-3.45784	-2.3148	-8.6804
	Moderate trade substitution limit	-3.48461	-2.22059	-4.59957
	No trade substitution limit	-3.58624	-2.07829	-4.29166
Strong Disruption	Strict trade substitution limit	-5.79554	-3.82662	-13.4064
	Moderate trade substitution limit	-5.69638	-3.71651	-7.71191
	No trade substitution limit	-5.75966	-3.3771	-6.20646
3.4 The change of importing structure
3.4.1 The change of importing structure of Coal in EU under all scenarios in 2022 (Percentage points)
Scenario		Region
		USA	China	Japan	Russia	India	OBU	OWE	EES	Asia	MAF	LAM
Moderate Disruption	Strict trade substitution limit	3.09273	0.0126669	8.1713e-06	-19.4594	5.5996e-05	6.45221	0.173736	1.56975	1.90843	3.10014	4.37695
	Moderate trade substitution limit	3.08007	0.0128311	8.27966e-06	-19.6973	5.66426e-05	6.60529	0.166106	1.58757	1.97593	3.19366	4.37992
	No trade substitution limit	3.04261	0.0125793	8.22755e-06	-19.7013	5.52171e-05	6.60127	0.16942	1.40639	1.99626	3.30233	4.47651
Strong Disruption	Strict trade substitution limit	5.25935	0.0216346	1.39208e-05	-29.6971	9.56424e-05	11.0213	0.303736	2.48289	3.27913	5.266	7.57508
	Moderate trade substitution limit	5.21478	0.0219785	1.40753e-05	-29.8267	9.71903e-05	11.2365	0.284502	2.54065	3.36659	5.34867	7.4545
	No trade substitution limit	5.14011	0.0215164	1.39916e-05	-29.8696	9.44877e-05	11.2582	0.287972	2.27684	3.41901	5.56919	7.58089
3.4.2 The change of importing structure of Oil in EU under all scenarios in 2022 (Percentage points)
Scenario		Region
		USA	China	Japan	Russia	India	OBU	OWE	EES	Asia	MAF	LAM
Moderate Disruption	Strict trade substitution limit	2.28854	0.513613	0.138181	-23.0058	1.09702	0.101105	2.8752	3.81648	2.27024	12.3318	1.29254
	Moderate trade substitution limit	2.23391	0.524741	0.139944	-23.1688	1.09361	0.104855	2.73597	4.00779	2.29754	12.4889	1.31391
	No trade substitution limit	2.25018	0.550206	0.147881	-23.3186	1.12921	0.110258	2.63994	3.99005	2.32163	12.6693	1.32742
Strong Disruption	Strict trade substitution limit	3.84742	0.863148	0.229881	-35.9933	1.81854	0.173938	4.79054	6.34703	4.01502	21.6653	2.30493
	Moderate trade substitution limit	3.75899	0.873255	0.23073	-36.0459	1.80161	0.177877	4.57133	6.53299	4.04253	21.8384	2.33004
	No trade substitution limit	3.74069	0.930412	0.246511	-36.1427	1.85797	0.190096	4.32192	6.53813	4.06611	22.0869	2.34803
3.4.3 The change of importing structure of Natural gas in EU under all scenarios in 2022 (Percentage points)
Scenario		Region
		USA	China	Russia	India	OBU	OWE	EES	Asia	MAF	LAM
Moderate Disruption	Strict trade substitution limit	0.0432353	2.6174e-05	-19.5189	1.1379e-06	0.0877164	14.6947	0.146212	0.526284	14.6568	0.703205
	Proper trade substitution limit	0.0665682	4.02995e-05	-23.1345	1.75199e-06	0.135055	12.8638	0.22512	0.810306	22.5667	1.08271
	No trade substitution limit	0.0933639	5.8957e-05	-23.3937	2.42581e-06	0.20196	11.8861	0.346106	1.23942	23.3457	1.19402
Strong Disruption	Strict trade substitution limit	0.0744314	4.50597e-05	-30.1541	1.95894e-06	0.151008	25.2975	0.251711	0.90602	25.2323	1.2106
	Proper trade substitution limit	0.0918354	5.55958e-05	-32.1455	2.41699e-06	0.186317	23.7623	0.310568	1.11787	31.1322	1.49367
	No trade substitution limit	0.155881	9.8435e-05	-32.6029	3.99116e-06	0.340238	18.1011	0.575613	2.08353	36.3737	1.89381
