# Supplementary material for: Carbon emissions and economic impact of EU’s embargoing Russian fossil fuels
Source: Research Square preprint supplement (doi:10.21203/rs.3.rs-1683339/v1), 2022-05-25
Supplement: Supplementary file 5 [file f9cc01f98f958e75e225db07.docx]

**Supplementary material : C3IAM/GEEPA introduction**

GEEPA is a multi-regional recursive dynamic CGE model, which is composing of production, income, expenditure, investment and foreign trade basic modules. The closure rule is also introduced here.

**1. Production module**

Each sector has been assumed to produce only one commodity. The inputs of each sector include intermediate inputs (energy and other goods), and primary inputs (labor and capital). The production of each sector is represented by a nested constant elasticity of substitute (CES) function, as shown in the following Equation (S1):

(S1)

Where refer to the output of sector in region, is the input of sector in regions,is the sector productivity,is the share parameter, is the substitution parameter, is the elasticity of substitution, is the price of commodity in regions.

Considering the production characteristics of different sectors, and referring to existing studies about this, GEEPA divides the sectors into four main sectors: including Generic economic sectors, Agriculture sector, Primary energy sector, Oil refining sector, Gas production and supply, Coking and Electricity sector. See (Wei et al., 2018) for further details.

**2. Income and expenditure module**

**2.1 Household**

In GEEPA, household income mainly comes from factor income (e.g. labor income and capital returns), and household expenditure includes paying household income tax, and spend disposable income on saving and on the consumption of various commodities. Household saving is obtained by multiplying household disposable income with saving rate, and which is described with an extended linear expenditure system (ELES) function household consumption as Eq. (S2):

(S2)

Where and respectively represents the consumption volume and consumption share of commodity by household in region ; is the composite price of commodity (imports and domestic products) in region ; and respectively represents the disposable income and the saving rate of household in region .

**2.2 Government**

In GEEPA, government income is composed of tariff, indirect tax, household income tax and transfers from other countries/regions. The government spends its revenues on government consumption, transfers to households and the repayment of exports. For a given period, government saving is calculated as the difference between government income and spending. In our model, government consumption is always at its initial level, that is, government consumption is fixed.

**3. Foreign trade module**

When ignoring the cost of transportation, the value of commodity between from region to region and from region to region is homogeneous. GEEPA adopts Armington assumption, which assuming there is imperfect substitutability between imports and domestic output sold domestically. The commodity that supplied domestically is composed of domestic and imported commodities following a CES function. Furthermore, domestic commodity is used to meet domestic demands and for exports. In GEEPA, we uses a constant elasticity transformation (CET) function to allocate total domestic output between exports and domestic sales, shown in Eq. (S3):

(S3)

Where and respectively represent exports and domestic sales of domestically produced good in region ; and respectively represent export price and domestic sale price of domestically produced good in region ; and respectively represent the shift parameter and share parameter in transformation function; and respectively represent the substitution parameter and substitution elasticity in CET function between export and domestic sales.

**4. Investment module**

Total investment is divided by inventory change and fixed capital investment. Inventory change in each sector is associated with a fixed ratio of the output in the sector respectively and fixed capital investment allocates among sectors according to fixed share. Relevant equations are as follows:

(S4)

Where represents total investment in region ;,, represents household and government saving in region , respectively; is foreign saving in foreign currency in region ; is exchange rate in region ; represents total fixed capital investment in region ; represents inventory change in sector in region ; is the price of fixed capital input in sector in region ; is the composite price of commodity (imports and domestic products); is the share of inventory change to total output in sector in region ; is the share of sector obtained in total fixed capital investment, which equals the share of sector in region in base year capital income (depreciation of capital plus earning surplus).

**5. Macro Closure**

For an open economy model, the macro closure includes two parts: investment-savings balance; current account balance. In general, neoclassical closure is followed in our model.

Regarding to investment-savings balance, the model has only one equation representing the investment–savings balance, however, there are two endogenous variables, namely, investment and savings. It is impossible to get solutions for all the endogenous variables. Therefore, we fixed savings as an exogenous variable and to equalize investment endogenously to this savings, that is, savings-driven closure.

Regarding to current account balance, the balance of payments constraint decides foreign savings and the foreign exchange rate. In our model, we chose to make foreign savings exogenous whereas foreign exchange rate is endogenous.
